# Supplementary material for: Toward the Complete Functional Characterization of a Minimal Bacterial Proteome
Source: PubMed Central journal article supplement — J Phys Chem B. 2022 Sep 1;126(36):6820–34. doi: 10.1021/acs.jpcb.2c04188 (PMC9483919; doi:10.1021/acs.jpcb.2c04188), 2022-09-01
Supplement: jp2c04188_si_001.pdf [file jp2c04188_si_001.pdf]

---

# Towards the Complete Functional Characterization of a Minimal Bacterial Proteome

David M. Bianchi<sup>1</sup>, James F. Pelletier<sup>2</sup>, Clyde A. Hutchison III<sup>3</sup>, John I. Glass<sup>3</sup>, Zaida Luthey-Schulten<sup>1,\*</sup>

1 Department of Chemistry, University of Illinois Urbana-Champaign, 600 S Mathews Ave. Urbana, IL 61801

2 Centro Nacional de Biotecnología, Calle Darwin no. 3, 28049 Madrid, ESP

3 J. Craig Venter Institute, 4120 Capricorn Ln. La Jolla, CA 92037

\* zan@illinois.edu

## Supporting Information

### Section S1 Additional Genes Characterized

**Table S1.** Table of General Genes Characterized Computationally. JCVI-syn3A genes involved in more general cellular functions in ascending order of gene locus tag (NCBI Entry - NCBI GenBank: CP002027.1). The general cellular function and the name of the most similar analogous gene discovered from the computational workflow for a related species is given.

| Gene                  | General Function                                |
|-----------------------|-------------------------------------------------|
| <i>azoR/0029</i>      | NADH-azoreductase                               |
| <i>ftsH/0039</i>      | Membrane Protein Protease                       |
| <i>ywnG-like/0146</i> | Unknown - <i>B. subtilis</i> ortholog           |
| <i>ytoP-pepA/0154</i> | Aminopeptidase                                  |
| <i>prkC/0264</i>      | Serine-threonine protein kinase                 |
| <i>ylxR/0298</i>      | Transcription Termination Nucleic Acid Binding  |
| <i>ylxQ/0299</i>      | RNA Binding Ribosomal Protein L7A               |
| <i>ynzC-like/0315</i> | DNA Damage Control                              |
| <i>dnaD-like/0352</i> | DNA Replication Machinery                       |
| <i>thiJ-like/0400</i> | Protein deglycase                               |
| <i>yqfO-like/0409</i> | GTP cyclohydrolase                              |
| <i>yqgC-like/0424</i> | Unknown - <i>B. subtilis</i> ortholog           |
| <i>ymdB/0431</i>      | Damage Control phosphoesterase                  |
| <i>cutC-like/0433</i> | Copper Homeostasis Regulator                    |
| <i>prp-like/0500</i>  | Ribosomal protein processing protease           |
| <i>pepF-like/0693</i> | Growth Regulation Peptidase                     |
| <i>fic/0805</i>       | Filamentation/Protein Adenylation               |
| <i>whiA/0817</i>      | Cell Division/Chromosome Segregation Regulation |
| <i>yqxA-like/0830</i> | Growth factor                                   |
| <i>ychF/0872</i>      | Ribosome Binding Factor ATPase                  |

**Table S2.** Table of General Genes Characterized Computationally. JCVI-syn3A genes involved in more general cellular functions in ascending order of gene locus tag (NCBI Entry - NCBI GenBank: CP002027.1). The p-value for significant structural similarity generated from FATCAT structural alignment<sup>1</sup> and the closest PDB Structure to which the AlphaFold prediction is aligned are given for each gene (AF2 signifies an AlphaFold predicted structure where experiment is unavailable).

| Gene                  | Structure p-value (RMSD Å)    | Closest PDB                         |
|-----------------------|-------------------------------|-------------------------------------|
| <i>azoR/0029</i>      | 0.00 (2.35)                   | 3W77                                |
| <i>ftsH/0039</i>      | 0.00 (2.25)                   | 2DHR                                |
| <i>ywnG-like/0146</i> | $3.28 \times 10^{-4}$ (2.10)  | AF2 <i>B. subtilis</i> <sup>2</sup> |
| <i>ytoP-pepA/0154</i> | 0.00 (2.00)                   | 3JRU                                |
| <i>prkC/0264</i>      | 0.00 (2.18)                   | 4EQM                                |
| <i>ylxQ/0298</i>      | 0.00 (1.30)                   | 3V7Q                                |
| <i>ylxR/0299</i>      | $7.43 \times 10^{-14}$ (1.69) | 1G2R                                |
| <i>ynzC-like/0315</i> | $8.94 \times 10^{-12}$ (0.58) | 3BHP                                |
| <i>dnaD-like/0352</i> | $6.94 \times 10^{-9}$ (2.08)  | 2V79                                |
| <i>thiJ-like/0400</i> | $2.12 \times 10^{-13}$ (2.79) | 3EFE                                |
| <i>yqfO-like/0409</i> | $4.44 \times 10^{-16}$ (2.51) | AF2 <i>B. subtilis</i> <sup>3</sup> |
| <i>yqgC-like/0424</i> | $3.13 \times 10^{-4}$ (2.63)  | AF2 <i>B. subtilis</i> <sup>4</sup> |
| <i>ymdB/0431</i>      | 0.00 (1.02)                   | 4B2O                                |
| <i>cutC-like/0433</i> | 0.00 (1.82)                   | 1TWD                                |
| <i>prp-like/0500</i>  | $4.29 \times 10^{-14}$ (1.36) | 2P92                                |
| <i>pepF-like/0693</i> | $9.95 \times 10^{-4}$ (4.35)  | 2QR4                                |
| <i>fic/0805</i>       | $4.05 \times 10^{-11}$ (3.17) | 3EQX                                |
| <i>whiA/0817</i>      | $1.11 \times 10^{-16}$ (2.23) | 3HYI                                |
| <i>yqxA-like/0830</i> | $3.81 \times 10^{-6}$ (1.86)  | AF2 <i>B. subtilis</i> <sup>5</sup> |
| <i>ychF/0872</i>      | 0.00 (1.87)                   | 1JAL                                |

## Section S2 JCVI-syn3A AlphaFold2 Predictions Database

We also provide a database of AlphaFold2 predictions for all of the approximately 450 protein-coding genes in JCVI-syn3A (generated using the same program parameters given in Section Methods). Along with this database we provide a Jupyter Notebook for visualization and analysis of AlphaFold2 predicted structures (with associated prediction confidence coloring *etc.*) and relevant associated data.

The database and Jupyter Notebook can be found at [Database Link](#).

## Section S3 Summary of Updated JCVI-syn3A Gene Product Annotations

*Spreadsheet\_S11.xlsx* gives the updated gene product annotations generated from this study along with the previous gene product annotations and associated Transposon Mutagenesis gene essentiality data that was published by Breuer *et al.*<sup>6</sup> for all 450+ protein-coding genes in JCVI-syn3A. This data is available at: [SI Table Link](#), under the Supplementary Table link.

---

## References

1. Li, Z.; Jaroszewski, L.; Iyer, M.; Sedova, M.; Godzik, A. *Nucleic Acids Research* **2020**, *48*, W60–W64.
2. Uncharacterized protein YwnG - AlphaFold structure prediction.  
<https://alphafold.ebi.ac.uk/entry/P71042>, Date Accessed: 2022-04-03.
3. GTP cyclohydrolase 1 type 2 homolog - AlphaFold structure prediction.  
<https://alphafold.ebi.ac.uk/entry/P54472>, Date Accessed: 2022-04-03.
4. Uncharacterized protein YqgC - AlphaFold structure prediction.  
<https://alphafold.ebi.ac.uk/entry/P54486>, Date Accessed: 2022-04-03.
5. Uncharacterized protein YqxA - AlphaFold structure prediction.  
<https://alphafold.ebi.ac.uk/entry/P38425>, Date Accessed: 2022-04-03.
6. Breuer, M. et al. *eLife* **2019**, *8*.
